# Supplementary material
Source: ML conference proceedings conference paper supplement (https://openreview.net/forum?id=LgDMOie21k)
Supplement: supplementary_material [file attachment]

# Supplementary Materials: Perceptual Oriented Image Restoration is a Multi-Objective Optimization Problem

Qiwen Zhu

State Key Lab of MIPT, Huazhong  
University of Science and Technology  
Wuhan, China  
zhuqiwen@hust.edu.cn

Yanjie Wang

School of AIA, Huazhong University  
of Science and Technology  
Wuhan, China  
aiawyj@hust.edu.cn

Shilv Cai

School of AIA, Huazhong University  
of Science and Technology  
Wuhan, China  
caishilv@hust.edu.cn

Liqun Chen

School of AIA, Huazhong University  
of Science and Technology  
Wuhan, China  
chenliqun@hust.edu.cn

Jiahuan Zhou

Wangxuan Institute of Computer  
Technology, Peking University  
Beijing, China  
jiahuanzhou@pku.edu.cn

Luxin Yan

State Key Lab of MIPT, Huazhong  
University of Science and Technology  
Wuhan, China  
yanluxin@hust.edu.cn

Sheng Zhong

State Key Lab of MIPT, Huazhong  
University of Science and Technology  
Wuhan, China  
zhongsheng@hust.edu.cn

Xu Zou\*

State Key Lab of MIPT, Huazhong  
University of Science and Technology  
Wuhan, China  
zoux@hust.edu.cn

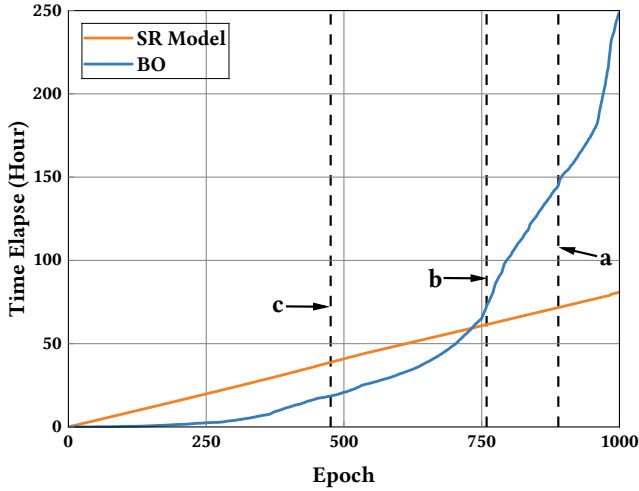

**Figure 1: Comparative of the time consumed for training the SR model against the time required for BO during the training process of our MOBOSR. The temporal measurements were conducted on an server with NVIDIA RTX 3090 GPU and two Intel Xeon Gold 6226R CPUs. Epochs for Ours-[a,b,c] are labeled for clarity.**

## 1 Time Analysis

Bayesian Optimization (BO) minimizes the number of evaluations by substituting the actual objective function with a surrogate function and heuristically determining the most promising points for improvement through an acquisition function for subsequent evaluation rounds. Consequently, this approach significantly conserves

\*Corresponding author.

**Table 1: Detailed comparison of time expended for sampling points Ours-[a,b,c] and at the optimization cessation.**

| Point  | Epoch | SR Time Elapse | MOBO Time Elapse |
|--------|-------|----------------|------------------|
| Ours-c | 476   | 38.8h          | 18.6h            |
| Ours-b | 759   | 61.4h          | 72.6h            |
| Ours-a | 889   | 71.7h          | 145.2h           |
| End    | 1000  | 80.8h          | 248.4h           |

optimization iteration compared to evolutionary algorithms. However, the BO process necessitates the computation of the covariance matrix, resulting in a time complexity of  $O(n^3)$ . If the objective function be overly intricate or the problem dimensions too high, necessitating numerous optimization rounds, this would substantially increase the optimization time.

In the main text, the three sampling points selected from the perceptual-distortion Pareto front, labeled as Ours-[a,b,c], were obtained at epochs 476, 759 and 889, respectively. As shown in Table 1 and Figure 1, the time consumed to train the Super-Resolution (SR) model with Ours-c, obtained at epoch 476, was approximately half of that required for BO. At epoch 759, the training time for the SR model with Ours-b was nearly identical to that for BO. However, by epoch 889, the time expended on BO for Ours-a was roughly half of that for training the SR model. By the designated optimization halt at epoch 1000, the time consumption for BO had become threefold that of the SR model.

But, after optimization up to epoch 759 (Ours-c), there were no significant changes in the Pareto front (as shown in Figure 2). We believe that the substantial advantages brought by our Multi-Objective Bayesian Optimization Super-Resolution (MOBOSR), and without introducing any additional computational load during inference, justify the mere doubling of training duration.

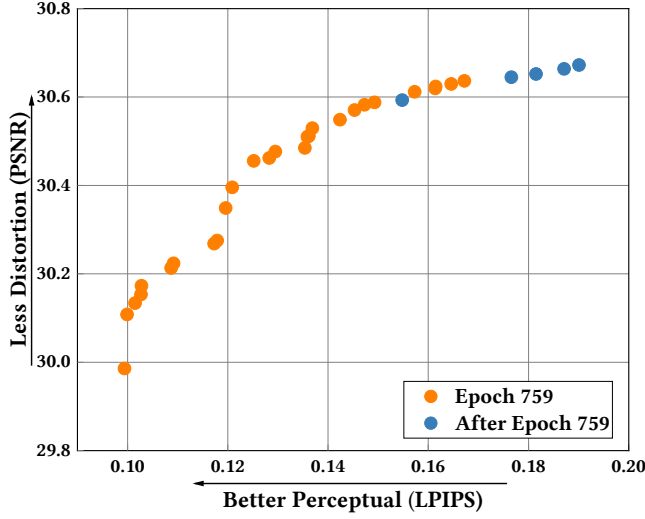

Figure 2: Changes in the perception-distortion Pareto frontier obtained by our MOBOSR after epoch 759.

Table 2: Analyses of multi-task learning on the DIV2K [1] validation set. The best and second-best results are highlighted in bold and underline, respectively. MTL methods show significant improvements over the manually weighted ESRGAN [12] but are not as effective as our MOBOSR.

| Methods       | PSNR↑          | SSIM↑         | LR-PSNR↑       | LPIPS↓        |
|---------------|----------------|---------------|----------------|---------------|
| ESRGAN [12]   | 27.6994        | 0.7610        | 41.2244        | 0.1193        |
| CAGrad [5]    | <u>28.4434</u> | <u>0.7803</u> | <b>47.5291</b> | <u>0.1161</u> |
| NashMTL [7]   | 28.1606        | 0.7717        | 43.7037        | 0.1168        |
| MOBOSR (Ours) | <b>28.5089</b> | <b>0.7834</b> | <u>44.6847</u> | <b>0.1145</b> |

## 2 Discussion on Multi-Task Learning

Focusing on a single task may overlook the information from related tasks that could improve the target task. By sharing parameters between different tasks (with different loss functions) to a certain extent may achieve better generalization for the original task. Hence, we discuss the impact of Multi-Task Learning (MTL) in balancing the distortion and perceptual quality for SISR models. We initially consider using MTL to optimize multiple loss functions to address the balance issue. We compare the results of our MOBOSR with 2 MTL methods (CAGrad [5] and NashMTL [7]), as well as with ESRGAN [12]. As shown in Table 2, MTL methods show significant improvements over the manually weighted ESRGAN [12] but are not as effective as our MOBOSR. We believe this is because MTL approaches just seek a single compromise between multi-task/multi-loss rather than searching for the entire Pareto frontier as MOBO does. But, the ability to achieve these outcomes indicates that MTL merits further investigation.

## 3 Metrics Recalculation Details

Due to the variations in datasets and metrics reported by the methods under comparison, as well as the differences in implementation

details during metric computation, we have adopted a uniform metric calculation method to re-evaluate the metrics of other methods. This ensures a fairer comparison. We generated SR results for all test sets using the model weights and inference code released by the authors, followed by calculations using our standardized metric computation program. Our codes for metric calculation are detailed in the GitHub repository: <https://github.com/ZhuKeven/MOBOSR>. Table 3 presents the metrics we recomputed alongside those reported by the authors, with most showing no significant differences and some even surpassing the reported results. Wang et al. only reported metrics for the RRDB-PSNR [12] model trained with L1 loss, without providing the metrics for the ESRGAN [12] model trained using GAN [2]. Consequently, we are unable to present the ESRGAN [12] metrics comparison in Table 3 in the same manner as for other methods.

## 4 More Quantitative Results

Due to the length constraints of the main text, we have included the complete results for Ours-[a,b,c] here, as well as the metrics for the RRDB-PSNR [12] model trained using L1 loss. Although RRDB-PSNR [12] exhibits superior performance in terms of PSNR and SSIM [13] metrics, the margin by which it surpasses Ours-a is considerably less than the extent to which Ours-a exceeds RRDB-PSNR [12] in perceptual (LPIPS) and consistency (LR-PSNR) metrics. Not to mention that the RRDB-PSNR [12] was trained on a significantly larger dataset, the DF2K-OST (13774 images), which comprises the DIV2K [1] training set (800 images), Flickr2K [10] (2650 images), and OST [11] (10,324 images), whereas our MOBOSR was trained solely on the DIV2K [1] training set (800 images).

## 5 More Visual Results

We have included more visual comparison results here, including the visualizations on the Urban100 [3] dataset as shown in Figure 3 and Figure 4, and the visualizations on the DIV2K [1] validation set as shown in Figure 5.

## References

- [1] Eirikur Agustsson and Radu Timofte. 2017. NTIRE 2017 Challenge on Single Image Super-Resolution: Dataset and Study. In *Proceedings of the IEEE/CVF Conference on Computer Vision and Pattern Recognition Workshops (CVPRW)*. 1122–1131.
- [2] Ian Goodfellow, Jean Pouget-Abadie, Mehdi Mirza, Bing Xu, David Warde-Farley, Sherjil Ozair, Aaron Courville, and Yoshua Bengio. 2020. Generative adversarial networks. *Commun. ACM* 63, 11 (oct 2020), 139–144.
- [3] Jia-Bin Huang, Abhishek Singh, and Narendra Ahuja. 2015. Single Image Super-Resolution From Transformed Self-Exemplars. In *Proceedings of the IEEE/CVF Conference on Computer Vision and Pattern Recognition (CVPR)*. 5197–5206.
- [4] Jie Liang, Hui Zeng, and Lei Zhang. 2022. Details or Artifacts: A Locally Discriminative Learning Approach to Realistic Image Super-Resolution. In *Proceedings of the IEEE/CVF Conference on Computer Vision and Pattern Recognition (CVPR)*. 5657–5666.
- [5] Bo Liu, Xingchao Liu, Xiaojie Jin, Peter Stone, and Qiang Liu. 2021. Conflict-Averse Gradient Descent for Multi-task Learning. In *Proceedings of the Advances in Neural Information Processing Systems (NeurIPS)*, Vol. 34. 18878–18890.
- [6] Cheng Ma, Yongming Rao, Yean Cheng, Ce Chen, Jiwen Lu, and Jie Zhou. 2020. Structure-Preserving Super Resolution With Gradient Guidance. In *Proceedings of the IEEE/CVF Conference on Computer Vision and Pattern Recognition (CVPR)*. 7766–7775.
- [7] Aviv Navon, Aviv Shamsian, Idan Achituve, Haggai Maron, Kenji Kawaguchi, Gal Chechik, and Ethan Fetaya. 2022. Multi-Task Learning as a Bargaining Game. In *Proceedings of the International Conference on Machine Learning (ICML)*, Vol. 162. 16428–16446.
- [8] Joonkyu Park, Sanghyun Son, and Kyoung Mu Lee. 2023. Content-Aware Local GAN for Photo-Realistic Super-Resolution. In *Proceedings of the IEEE/CVF*



**Table 3: Comparison of metrics calculated using our uniform method versus those reported by the authors, showing minimal difference, with some even surpassing the reported results. The higher results are highlighted in bold. The symbols  $\uparrow$  and  $\downarrow$  indicate that higher or lower values of the metric are preferable.**

| Metric             | Dataset    | RRDB-PSNR [12] |              | SPSR [6]      |                | RRDB+LDL [4]  |                | CAL-GAN [8]   |                | SROOE [9]     |                |
|--------------------|------------|----------------|--------------|---------------|----------------|---------------|----------------|---------------|----------------|---------------|----------------|
|                    |            | Author         | Recalculated | Author        | Recalculated   | Author        | Recalculated   | Author        | Recalculated   | Author        | Recalculated   |
| PSNR $\uparrow$    | Set5       | <b>32.73</b>   | 32.7010      | <b>30.400</b> | 30.3871        | 30.985        | <b>31.0007</b> | <b>31.177</b> | 31.0475        | -             | 31.2455        |
|                    | Set14      | <b>28.99</b>   | 28.9831      | 26.640        | <b>26.6501</b> | <b>27.491</b> | 27.2064        | -             | 27.3272        | -             | 27.2561        |
|                    | DIV2K      | -              | 30.8888      | -             | 28.1824        | 28.951        | <b>28.9510</b> | 28.863        | <b>28.9549</b> | 27.69         | <b>29.0990</b> |
|                    | BSD100     | <b>27.85</b>   | 27.8235      | <b>25.505</b> | 25.4949        | -             | 26.0988        | 25.925        | <b>26.2581</b> | 24.87         | <b>26.1715</b> |
|                    | Urban100   | <b>27.03</b>   | 26.9859      | 24.799        | <b>24.8063</b> | <b>25.498</b> | 25.4781        | 25.290        | <b>25.2908</b> | 24.33         | <b>25.8452</b> |
|                    | General100 | -              | 31.9145      | 29.414        | <b>29.4794</b> | <b>30.232</b> | 30.1974        | <b>30.182</b> | 30.0742        | 28.74         | <b>30.4723</b> |
|                    | Manga109   | <b>31.66</b>   | 31.5637      | -             | 28.6102        | 29.407        | <b>29.4111</b> | -             | 29.1665        | 28.08         | <b>29.9017</b> |
| SSIM $\uparrow$    | Set5       | <b>0.9011</b>  | 0.9010       | <b>0.8627</b> | 0.8432         | <b>0.8626</b> | 0.8610         | <b>0.863</b>  | 0.8552         | -             | 0.8651         |
|                    | Set14      | <b>0.7917</b>  | 0.7915       | <b>0.7930</b> | 0.7133         | <b>0.7476</b> | 0.7343         | -             | 0.7353         | -             | 0.7304         |
|                    | DIV2K      | -              | 0.8485       | -             | 0.7720         | 0.7951        | <b>0.7952</b>  | <b>0.790</b>  | 0.7897         | 0.7932        | <b>0.7980</b>  |
|                    | BSD100     | <b>0.7455</b>  | 0.7453       | <b>0.6576</b> | 0.6571         | -             | 0.6811         | 0.676         | <b>0.6789</b>  | <b>0.6869</b> | 0.6866         |
|                    | Urban100   | <b>0.8153</b>  | 0.8152       | <b>0.9481</b> | 0.7472         | <b>0.7673</b> | 0.7670         | <b>0.763</b>  | 0.7623         | 0.7707        | <b>0.7764</b>  |
|                    | General100 | -              | 0.8725       | <b>0.8537</b> | 0.8095         | 0.8277        | <b>0.8278</b>  | 0.825         | <b>0.8262</b>  | 0.8297        | <b>0.8332</b>  |
|                    | Manga109   | <b>0.9196</b>  | 0.9195       | -             | 0.8591         | 0.8746        | <b>0.8746</b>  | -             | 0.8676         | 0.8554        | <b>0.8786</b>  |
| LR-PSNR $\uparrow$ | Set5       | -              | 53.0951      | -             | 46.3607        | -             | 48.5067        | -             | 42.4327        | -             | 53.1781        |
|                    | Set14      | -              | 50.8098      | -             | 43.6201        | -             | 46.2893        | -             | 41.5963        | -             | 51.0679        |
|                    | DIV2K      | -              | 51.9030      | -             | 44.8529        | -             | 47.9757        | -             | 42.8611        | 50.80         | <b>53.5488</b> |
|                    | BSD100     | -              | 50.3975      | -             | 42.6756        | -             | 45.1571        | -             | 41.0666        | 49.19         | <b>51.2347</b> |
|                    | Urban100   | -              | 51.0009      | -             | 42.6679        | -             | 46.5827        | -             | 41.6069        | 48.32         | <b>50.6700</b> |
|                    | General100 | -              | 52.6741      | -             | 44.6786        | -             | 48.0079        | -             | 43.4227        | 50.11         | <b>52.9797</b> |
|                    | Manga109   | -              | 52.3321      | -             | 44.3872        | -             | 47.8923        | -             | 42.8636        | 48.77         | <b>51.7820</b> |
| LPIPS $\downarrow$ | Set5       | -              | 0.1691       | 0.0644        | <b>0.0616</b>  | 0.0670        | <b>0.0637</b>  | <b>0.061</b>  | 0.0687         | -             | 0.0603         |
|                    | Set14      | -              | 0.2718       | 0.1318        | <b>0.1313</b>  | <b>0.1207</b> | 0.1309         | -             | 0.1320         | -             | 0.1131         |
|                    | DIV2K      | -              | 0.2526       | -             | 0.1097         | 0.1011        | <b>0.1007</b>  | <b>0.091</b>  | 0.1072         | 0.0957        | <b>0.0956</b>  |
|                    | BSD100     | -              | 0.3590       | <b>0.1611</b> | 0.1629         | -             | 0.1635         | <b>0.151</b>  | 0.1696         | <b>0.1500</b> | 0.1514         |
|                    | Urban100   | -              | 0.1956       | <b>0.1184</b> | 0.1186         | <b>0.1096</b> | 0.1097         | <b>0.108</b>  | 0.1171         | <b>0.1065</b> | 0.1067         |
|                    | General100 | -              | 0.1668       | <b>0.0863</b> | 0.0866         | <b>0.0790</b> | 0.0794         | <b>0.077</b>  | 0.0894         | <b>0.0753</b> | 0.0758         |
|                    | Manga109   | -              | 0.0977       | -             | 0.0662         | <b>0.0553</b> | 0.0546         | -             | 0.0688         | 0.0524        | <b>0.0511</b>  |

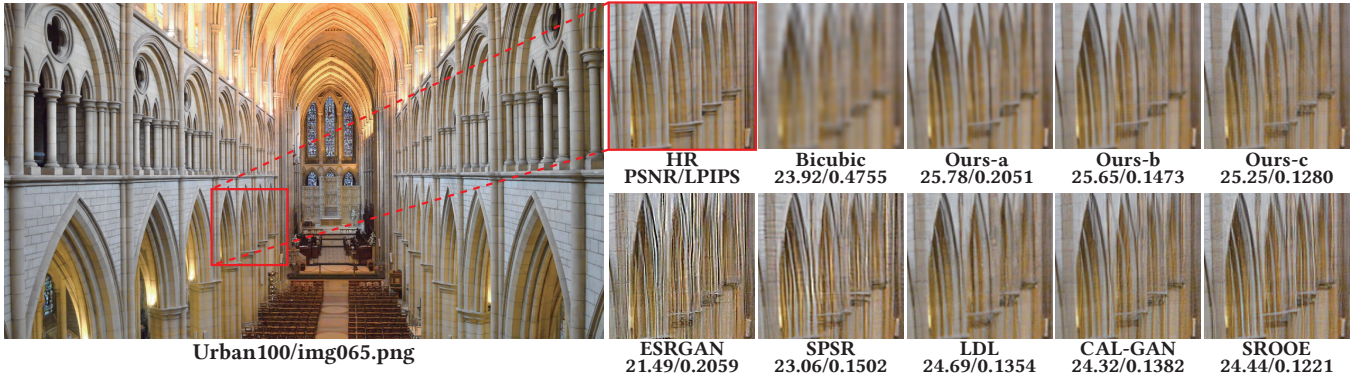**Figure 3: More visual comparisons on Urban100 [3].**

- International Conference on Computer Vision (ICCV). 10585–10594.
- [9] Seung Ho Park, Young Su Moon, and Nam Ik Cho. 2023. Perception-Oriented Single Image Super-Resolution using Optimal Objective Estimation. In *Proceedings of the IEEE/CVF Conference on Computer Vision and Pattern Recognition (CVPR)*. 1725–1735.
- [10] Radu Timofte, Eirikur Agustsson, Luc Van Gool, Ming-Hsuan Yang, Lei Zhang, Bee Lim, Sanghyun Son, Heewon Kim, Seungjun Nah, et al. 2017. NTIRE 2017 Challenge on Single Image Super-Resolution: Methods and Results. In *Proceedings of the IEEE/CVF Conference on Computer Vision and Pattern Recognition Workshops (CVPRW)*. 1110–1121.
- [11] Xintao Wang, Ke Yu, Chao Dong, and Chen Change Loy. 2018. Recovering Realistic Texture in Image Super-Resolution by Deep Spatial Feature Transform. In *Proceedings of the IEEE/CVF Conference on Computer Vision and Pattern Recognition (CVPR)*. 606–615.
- [12] Xintao Wang, Ke Yu, Shixiang Wu, Jinjin Gu, Yihao Liu, Chao Dong, Yu Qiao, and Chen Change Loy. 2019. ESRGAN: Enhanced Super-Resolution Generative Adversarial Networks. In *Proceedings of the European Conference on Computer Vision (ECCV)*. 63–79.

**Table 4: Comparison of Ours-[a,b,c] with other artworks on 7 datasets. The best, second-best and third-best results are highlighted in bold, underline and *italic*, respectively. The symbols  $\uparrow$  and  $\downarrow$  indicate that higher or lower values of the metric are preferable.**

| Metric             | Method         | Train Datasets | Set5           | Set14          | DIV2K          | BSD100         | Urban100       | General100     | Manga109       |
|--------------------|----------------|----------------|----------------|----------------|----------------|----------------|----------------|----------------|----------------|
| PSNR $\uparrow$    | RRDB-PSNR [12] | DF2K-OST       | <b>32.7010</b> | <b>28.9831</b> | <b>30.8888</b> | <b>27.8235</b> | <b>26.9859</b> | <b>31.9145</b> | <b>31.5637</b> |
|                    | ESRGAN [12]    | DF2K-OST       | 30.4618        | 26.2839        | 28.1778        | 25.2892        | 24.3617        | 29.4593        | 28.5041        |
|                    | SPSR [6]       | DIV2K          | 30.3871        | 26.6501        | 28.1824        | 25.4949        | 24.8063        | 29.4794        | 28.6102        |
|                    | RRDB+LDL [4]   | DIV2K          | 31.0007        | 27.2064        | 28.9510        | 26.0988        | 25.4781        | 30.1974        | 29.4111        |
|                    | CAL-GAN [8]    | DIV2K          | 31.0475        | 27.3272        | 28.9549        | 26.2581        | 25.2908        | 30.0742        | 29.1665        |
|                    | SROOE [9]      | DF2K           | 31.2455        | 27.2561        | 29.0990        | 26.1715        | 25.8452        | 30.4723        | 29.9017        |
|                    | Ours-a         | DIV2K          | <u>32.3663</u> | <u>28.7621</u> | <u>30.6384</u> | <u>27.6546</u> | <u>26.5285</u> | <u>31.6047</u> | <u>30.9787</u> |
|                    | Ours-b         | DIV2K          | <u>32.2126</u> | <u>28.6426</u> | <u>30.4890</u> | <u>27.5176</u> | <u>26.4439</u> | <u>31.4769</u> | <u>30.8840</u> |
|                    | Ours-c         | DIV2K          | 31.8272        | 28.1766        | 29.9858        | 27.0494        | 26.0764        | 31.1164        | 30.2763        |
| SSIM $\uparrow$    | RRDB-PSNR [12] | DF2K-OST       | <b>0.9010</b>  | <b>0.7915</b>  | <b>0.8485</b>  | <b>0.7453</b>  | <b>0.8152</b>  | <b>0.8725</b>  | <b>0.9195</b>  |
|                    | ESRGAN [12]    | DF2K-OST       | 0.8518         | 0.6982         | 0.7761         | 0.6496         | 0.7341         | 0.8102         | 0.8604         |
|                    | SPSR [6]       | DIV2K          | 0.8432         | 0.7133         | 0.7720         | 0.6571         | 0.7472         | 0.8095         | 0.8591         |
|                    | RRDB+LDL [4]   | DIV2K          | 0.8610         | 0.7343         | 0.7952         | 0.6811         | 0.7670         | 0.8278         | 0.8746         |
|                    | CAL-GAN [8]    | DIV2K          | 0.8552         | 0.7353         | 0.7897         | 0.6789         | 0.7623         | 0.8262         | 0.8676         |
|                    | SROOE [9]      | DF2K           | 0.8651         | 0.7304         | 0.7980         | 0.6866         | 0.7764         | 0.8332         | 0.8786         |
|                    | Ours-a         | DIV2K          | <u>0.8961</u>  | <u>0.7847</u>  | <u>0.8417</u>  | <u>0.7379</u>  | <u>0.7989</u>  | <u>0.8665</u>  | <u>0.9133</u>  |
|                    | Ours-b         | DIV2K          | <i>0.8918</i>  | <i>0.7800</i>  | <i>0.8376</i>  | <i>0.7323</i>  | <i>0.7963</i>  | <i>0.8629</i>  | <i>0.9093</i>  |
|                    | Ours-c         | DIV2K          | 0.8804         | 0.7615         | 0.8203         | 0.7109         | 0.7812         | 0.8495         | 0.8938         |
| LR-PSNR $\uparrow$ | RRDB-PSNR [12] | DF2K-OST       | 53.0951        | 50.8098        | 51.9030        | 50.3975        | 51.0009        | 52.6741        | 52.3321        |
|                    | ESRGAN [12]    | DF2K-OST       | 46.7348        | 43.8433        | 45.9012        | 43.8190        | 42.9339        | 45.4220        | 43.9667        |
|                    | SPSR [6]       | DIV2K          | 46.3607        | 43.6201        | 44.8529        | 42.6756        | 42.6679        | 44.6786        | 44.3872        |
|                    | RRDB+LDL [4]   | DIV2K          | 48.5067        | 46.2893        | 47.9757        | 45.1571        | 46.5827        | 48.0079        | 47.8923        |
|                    | CAL-GAN [8]    | DIV2K          | 42.4327        | 41.5963        | 42.8611        | 41.0666        | 41.6069        | 43.4227        | 42.8636        |
|                    | SROOE [9]      | DF2K           | 53.1781        | 51.0679        | 53.5488        | 51.2347        | 50.6700        | 52.9797        | 51.7820        |
|                    | Ours-a         | DIV2K          | <u>53.7806</u> | <b>53.5768</b> | <u>54.7418</u> | <b>54.2712</b> | <b>53.7559</b> | <u>54.1618</u> | <u>53.8049</u> |
|                    | Ours-b         | DIV2K          | <u>53.4204</u> | <i>53.1927</i> | <u>53.9850</u> | <i>53.3449</i> | <u>53.3426</u> | <u>53.9097</u> | <b>53.9045</b> |
|                    | Ours-c         | DIV2K          | <b>54.3372</b> | <u>53.3344</u> | <b>55.2161</b> | <u>53.3618</u> | <i>52.9401</i> | <b>54.5283</b> | <i>53.4195</i> |
| LPIPS $\downarrow$ | RRDB-PSNR [12] | DF2K-OST       | 0.1691         | 0.2718         | 0.2526         | 0.3590         | 0.1956         | 0.1668         | 0.0977         |
|                    | ESRGAN [12]    | DF2K-OST       | 0.0750         | 0.1341         | 0.1155         | <i>0.1617</i>  | 0.1228         | 0.0876         | 0.0647         |
|                    | SPSR [6]       | DIV2K          | <i>0.0616</i>  | 0.1313         | 0.1097         | 0.1629         | 0.1186         | 0.0866         | 0.0662         |
|                    | RRDB+LDL [4]   | DIV2K          | 0.0637         | <i>0.1309</i>  | <i>0.1007</i>  | 0.1635         | <u>0.1097</u>  | <i>0.0794</i>  | <u>0.0546</u>  |
|                    | CAL-GAN [8]    | DIV2K          | 0.0687         | 0.1320         | 0.1072         | 0.1696         | 0.1171         | 0.0894         | 0.0688         |
|                    | SROOE [9]      | DF2K           | <b>0.0603</b>  | <b>0.1131</b>  | <b>0.0956</b>  | <u>0.1514</u>  | <b>0.1067</b>  | <b>0.0758</b>  | <b>0.0511</b>  |
|                    | Ours-a         | DIV2K          | 0.1293         | 0.2148         | 0.1887         | 0.2723         | 0.1811         | 0.1342         | 0.0794         |
|                    | Ours-b         | DIV2K          | 0.0849         | 0.1604         | 0.1365         | 0.2051         | 0.1432         | 0.0978         | 0.0598         |
|                    | Ours-c         | DIV2K          | <u>0.0607</u>  | <u>0.1240</u>  | <u>0.0994</u>  | <b>0.1508</b>  | <i>0.1154</i>  | <u>0.0776</u>  | <i>0.0576</i>  |

[13] Zhou Wang, A.C. Bovik, H.R. Sheikh, and E.P. Simoncelli. 2004. Image Quality Assessment: from Error Visibility to Structural Similarity. *IEEE Transactions on*

*Image Processing* 13, 4 (2004), 600–612.



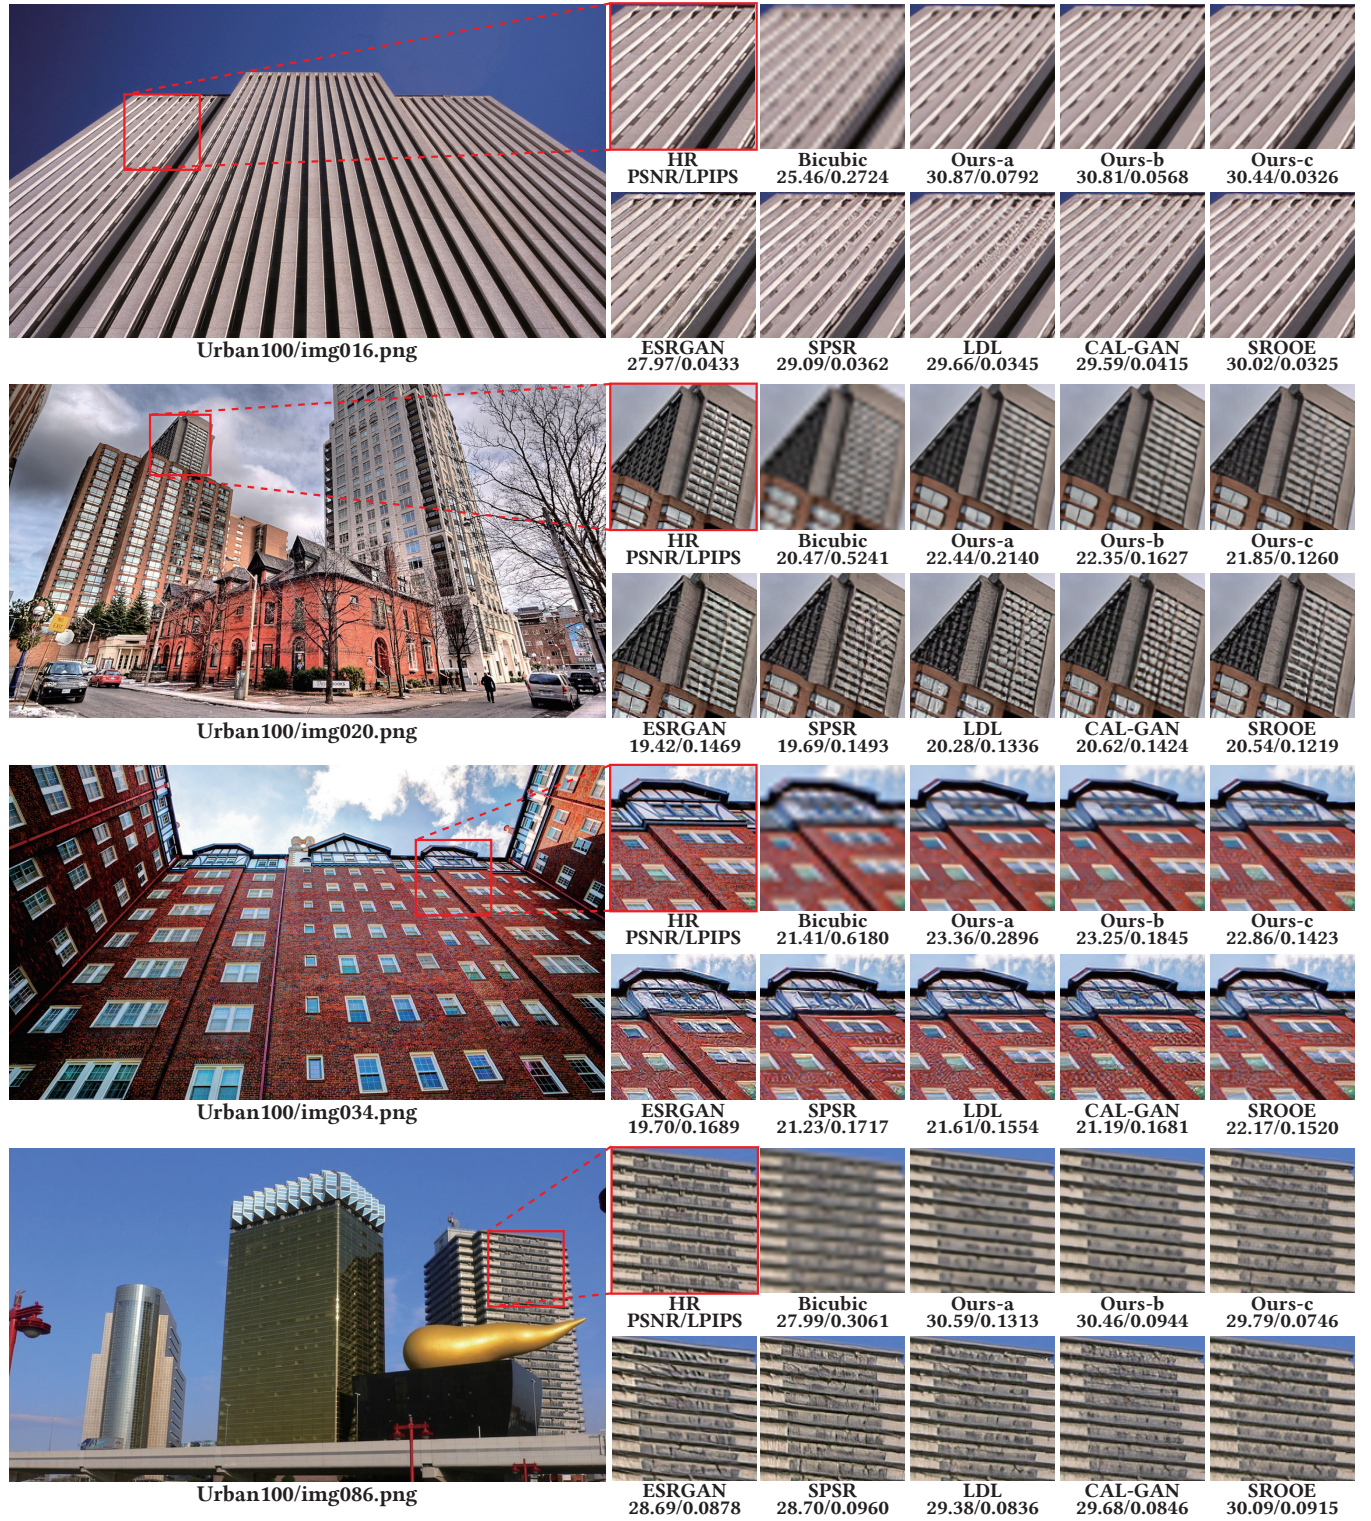

Figure 4: More visual comparisons on Urban100 [3].



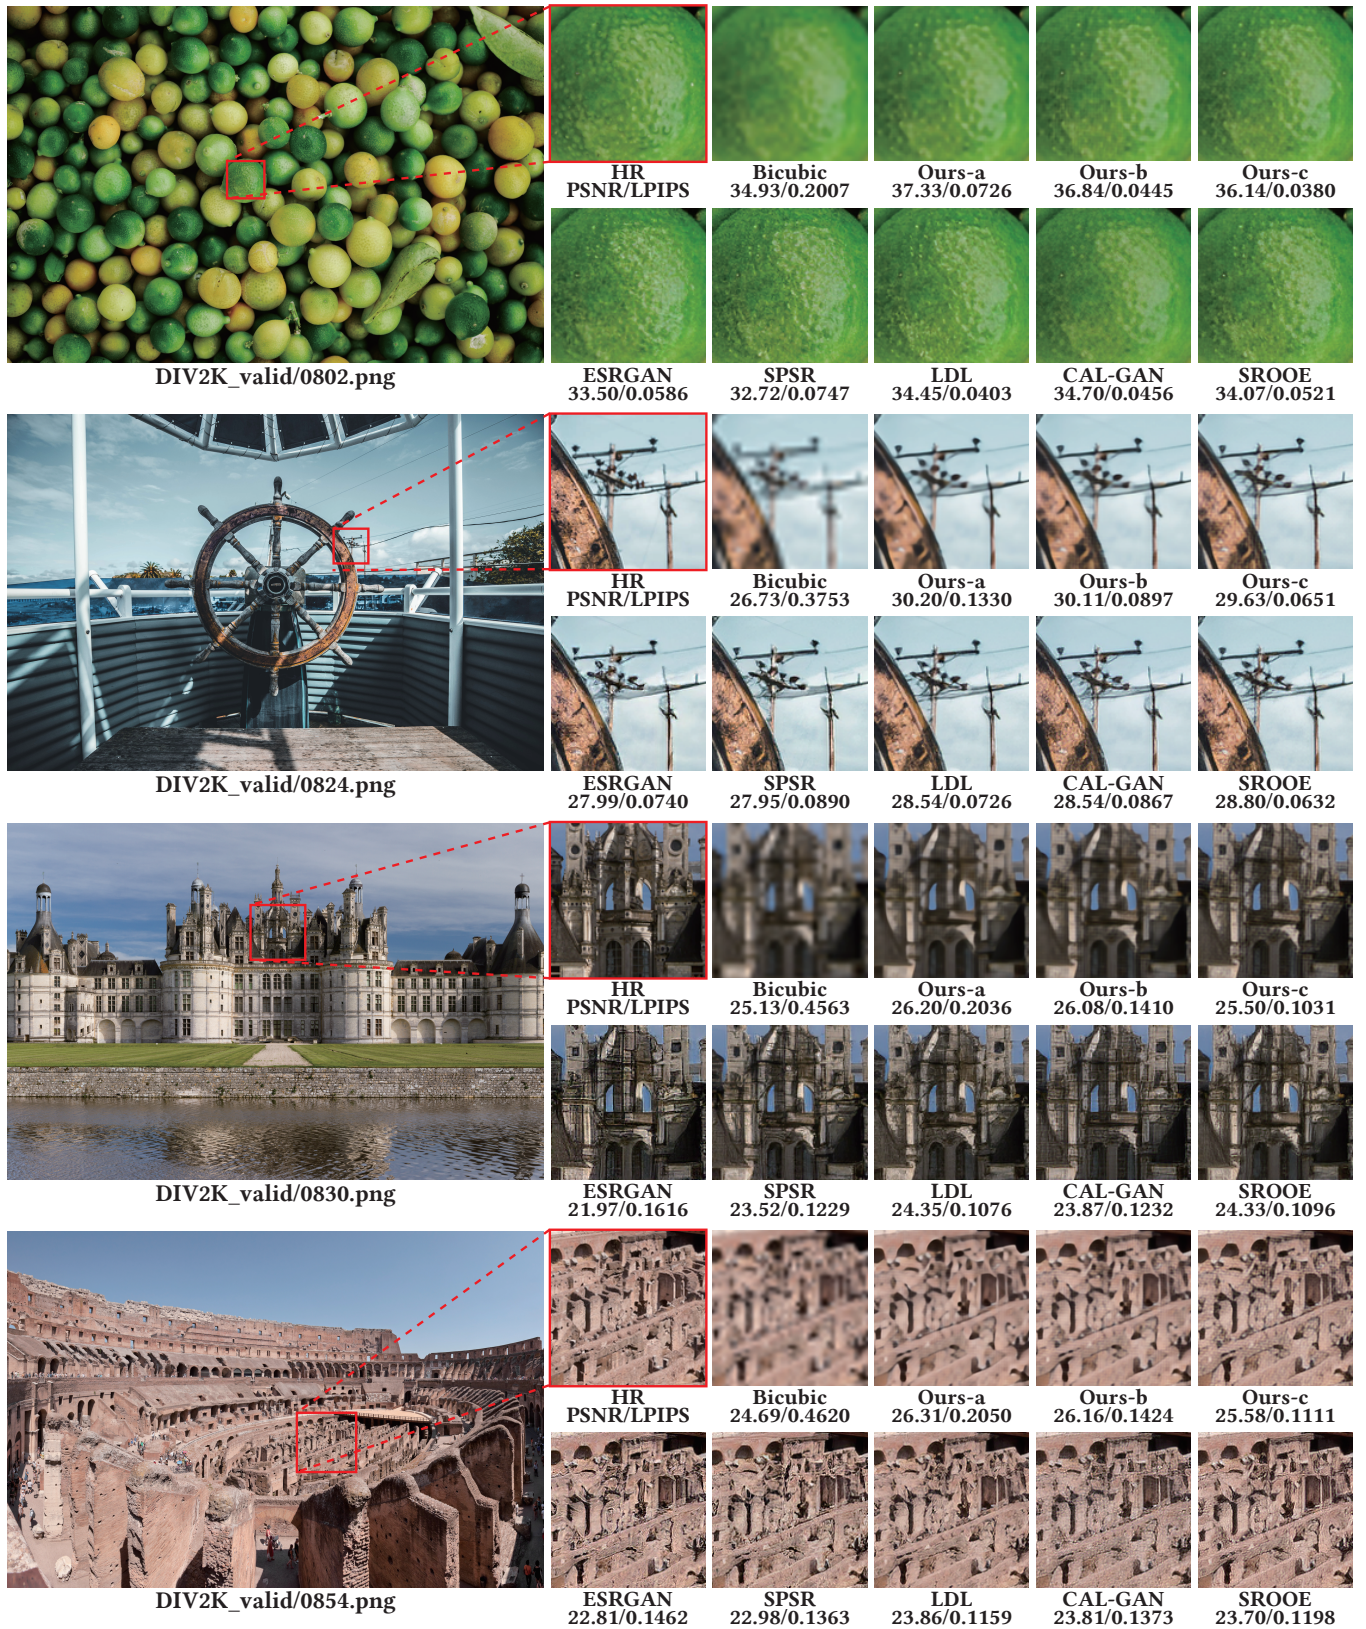

Figure 5: More visual comparisons on DIV2K [1] validation set.
